# Supplementary material for: Similar Ones Are Not Related and Vice Versa—New Dendronotus Taxa (Nudibranchia: Dendronotidae) from the North Atlantic Ocean Provide a Platform for Discussion of Global Marine Biodiversity Patterns
Source: MDPI journal article supplement (doi:10.3390/d15040504), 2023-04-01
Supplement: s1 [file s1]

# Supplementary Material S1

**Table S1.** List of specimens used for the molecular analyses in Korshunova et al. 2020 with the addition of the new data (highlighted in bold).

| <i>Species name</i>                                    | <i>Voucher</i>                           | <i>Locality</i>      | <i>COI</i>      | <i>16S</i>      |
|--------------------------------------------------------|------------------------------------------|----------------------|-----------------|-----------------|
| <i>Cabangus regius</i>                                 | CASIZ:179492                             | Philippines          | HM162708        | HM162629        |
| <i>Cabangus regius</i>                                 | CASIZ:179493                             | Philippines          | JN869451        | JN869407        |
| <i>Crosslandia viridis</i>                             | CASIZ192342                              |                      | KP871637        | KP871685        |
| <i>Dendronotus albus</i>                               | ZMMU:Op-566                              | USA: Washington      | KX788135        | KX788123        |
| <i>Dendronotus albus</i>                               | LACM:2004-2.2                            | USA: California      | KX058081        | KX058121        |
| <i>Dendronotus arcticus arcticus</i>                   | ZMMU:Op-561                              | Russia: Laptev Sea   | KX788140        | KX788129        |
| <i>Dendronotus arcticus arcticus</i>                   | ZMMU:Op-562                              | Russia: Laptev Sea   | KX788141        | KX788130        |
| <i>Dendronotus arcticus arcticus</i>                   | ZMMU:Op-563                              | Russia: Laptev Sea   | KX788142        | KX788131        |
| <b><i>Dendronotus arcticus arcticus</i></b>            | ZMMU: Op-564                             | Russia: Laptev Sea   | <b>OQ588822</b> | <b>OQ594740</b> |
| <i>Dendronotus arcticus arcticus</i>                   | ZMMU:Op-356 (the correct voucher number) | Russia: Kara Sea     | KP984995        | KP984989        |
| <b><i>Dendronotus arcticus gartensis n. subsp.</i></b> | ZMMU Op-804                              | Norway               | <b>OQ588823</b> | <b>OQ594741</b> |
| <b><i>Dendronotus arcticus gartensis n. subsp.</i></b> | ZMMU Op-802                              | Norway               | <b>OQ588824</b> | <b>OQ594742</b> |
| <i>Dendronotus claguei</i>                             | LACM 3554                                | Mexico               | -               | -               |
| <i>Dendronotus dalli</i>                               | ZMMU:Op-330                              | Russia: Kamchatka    | KM396999        | KM397081        |
| <i>Dendronotus dalli</i>                               | ZMMU:Op-331                              | Russia: Kamchatka    | KM397000        | KM397082        |
| <i>Dendronotus dalli</i>                               | -                                        | USA, North Atlantic? | AF249800        | AF249252        |
| <i>Dendronotus frondosus</i>                           | ZMMU:Op-380                              | Norway               | KM396976        | KM397056        |
| <i>Dendronotus frondosus</i>                           | ZMMU:Op-589                              | Norway: Gulen        | KY391833        | KY391853        |
| <i>Dendronotus frondosus</i>                           | ZMMU:Op-591                              | Norway: Gulen        | KY391835        | KY391855        |
| <i>Dendronotus frondosus</i>                           | ZMMU:Op-592                              | Norway: Gulen        | KY391836        | KY391856        |
| <b><i>Dendronotus frondosus</i></b>                    | CCMMO069-21                              | UK: N. Ireland       | <b>OQ588829</b> | -               |
| <b><i>Dendronotus frondosus</i></b>                    | CCMMO071-21                              | UK: N. Ireland       | <b>OQ588830</b> | -               |
| <i>Dendronotus elegans</i>                             | NF09                                     | Canada: Newfoundland | KU695598        | -               |
| <i>Dendronotus elegans</i>                             | ZMMU:Op-713                              | Greenland            | MT654640        | MT655312        |
| <i>Dendronotus elegans</i>                             | ZMMU:Op-269                              | Russia: White sea    | KM396996        | KM397078        |
| <i>Dendronotus elegans</i>                             | ZMMU:Op-279                              | Russia: Barents Sea  | KM396995        | KM397077        |
| <i>Dendronotus elegans</i>                             | ZMMU:Op-274.1                            | Norway : Barents Sea | KC660037        | KC611293        |
| <i>Dendronotus elegans</i>                             | ZMMU:Op-274.2                            | Norway : Barents Sea | KM396993        | KM397076        |
| <i>Dendronotus elegans</i>                             | ZMMU:Op-274.3                            | Norway : Barents Sea | KM396994        | KM397075        |
| <i>Dendronotus elegans</i>                             | ZMMU:Op-270                              | Russia: White sea    | KM396997        | KM397079        |
| <i>Dendronotus elegans</i>                             | WS1102                                   | Russia: White sea    | KC660036        | KC611292        |
| <i>Dendronotus elegans</i>                             | WS2005                                   | Russia: White sea    | KM396998        | KM397080        |
| <i>Dendronotus elegans</i>                             | ZMMU:Op-715                              | Russia: Laptev sea   | MT654635        | MT655308        |
| <i>Dendronotus elegans</i>                             | ZMMU:Op-716                              | Russia: Laptev sea   | MT654638        | MT655311        |
| <i>Dendronotus elegans</i>                             | ZMMU:Op-717                              | Russia: Laptev sea   | MT654639        | -               |
| <i>Dendronotus elegans</i>                             | WS9130                                   | Russia: White sea    | MN138334        | MN138100        |
| <i>Dendronotus elegans</i>                             | WS9123                                   | Russia: Kara Sea     | MN138331        | MN138097        |
| <i>Dendronotus elegans</i>                             | WS9124                                   | Russia: Kara Sea     | MN138332        | MN138098        |
| <i>Dendronotus elegans</i>                             | WS9125                                   | Russia: Kara Sea     | MN138333        | MN138099        |

|                                            |                       |                       |                 |                 |
|--------------------------------------------|-----------------------|-----------------------|-----------------|-----------------|
| <i>Dendronotus elegans</i>                 | IE211                 | Russia: Kara Sea      | MN138330        | MN138096        |
| <i>Dendronotus europaeus</i>               | ZMMU:Op-554           | Norway                | KY391823        | KY391842        |
| <i>Dendronotus europaeus</i>               | ZMMU:Op-581           | UK                    | KY391826        | KY391845        |
| <i>Dendronotus europaeus</i>               | ZMMU:Op-579           | UK                    | KY391824        | KY391843        |
| <i>Dendronotus europaeus</i>               | ZMMU:Op-578           | Norway                | KY391821        | KY391840        |
| <i>Dendronotus europaeus</i>               | ZMMU:Op-555           | Norway                | KY391837        | KY391839        |
| <i>Dendronotus iris</i>                    | CASIZ:174471          | USA: Washington       | KX058083        | HM162631        |
| <i>Dendronotus iris</i>                    | LACM:174194           | USA: Washington       | KX058082        | GU339188        |
| <i>Dendronotus jamsteci</i>                | JAMSTEC No.1160047463 | Japan                 | MN808558        | MN811023        |
| <i>Dendronotus jamsteci</i>                | JAMSTEC No.1160047475 | Japan                 | MN808559        | MN811024        |
| <i>Dendronotus kalikal</i>                 | ZMMU:Op-284.1         | Russia: Kamchatka     | KC660026        | KC611285        |
| <i>Dendronotus kalikal</i>                 | ZMMU:Op-284.2         | Russia: Kamchatka     | KC660025        | KC611286        |
| <i>Dendronotus kalikal</i>                 | ZMMU:Op-284.3         | Russia: Kamchatka     | KM396988        | KM397070        |
| <i>Dendronotus kalikal</i>                 | ZMMU:Op-283           | Russia: Kamchatka     | KC660024        | KC611284        |
| <i>Dendronotus kalikal</i>                 | ZMMU:Op-285           | Russia: Bering Strait | KC660027        | KC611287        |
| <i>Dendronotus kalikal</i>                 | ZMMU:Op-349.1         | Russia: Kamchatka     | KM396986        | KM397068        |
| <i>Dendronotus kalikal</i>                 | ZMMU:Op-349.2         | Russia: Kamchatka     | KM396987        | KM397069        |
| <i>Dendronotus kalikal</i>                 | ZMMU:Op-657           | Russia: Kuril Islands | MK302458        | MK302453        |
| <b><i>Dendronotus kalikal</i></b>          | ZMMU Op-808           | Russia: Kuril Islands | <b>OQ588825</b> | <b>OQ594743</b> |
| <i>Dendronotus kalikal</i>                 | WS9131                | Russia: Kuril Islands | MN138314        | MN138079        |
| <i>Dendronotus kalikal</i>                 | WS9132                | Russia: Kuril Islands | MN138315        | MN138080        |
| <i>Dendronotus kamchaticus</i>             | ZMMU:Op-245           | Russia: Kamchatka     | KC660032        | KC611288        |
| <i>Dendronotus kamchaticus</i>             | ZMMU:Op-565           | USA: Washington       | KX788144        | KX788111        |
| <b><i>Dendronotus keatleyae</i> n. sp.</b> | NTNU-VM-82154         | Norway                | <b>OQ588826</b> | <b>OQ594744</b> |
| <b><i>Dendronotus keatleyae</i> n. sp.</b> | NTNU-VM-82155         | Norway                | <b>OQ588827</b> | <b>OQ594745</b> |
| <b><i>Dendronotus keatleyae</i> n. sp.</b> | CCMMO067-21           | UK: N. Ireland        | <b>OQ588828</b> | -               |
| <b><i>Dendronotus keatleyae</i> n. sp.</b> | MT09656               | North Sea             | KR084744        | -               |
| <b><i>Dendronotus keatleyae</i> n. sp.</b> | MT09657               | North Sea             | KR084934        | -               |
| <i>Dendronotus lacteus</i>                 | ZMMU:Op-584           | Norway                | KY391830        | KY391849        |
| <i>Dendronotus lacteus</i>                 | ZMMU:Op-587           | Russia                | KY391838        | KY391851        |
| <i>Dendronotus lacteus</i>                 | ZMMU:Op-586           | Norway                | KY391829        | KY391848        |
| <i>Dendronotus lacteus</i>                 | ZMMU:Op-585           | Norway                | KY391831        | KY391850        |
| <i>Dendronotus nordenskioeldi</i>          | ZMMU:Op-665           | Russia: Laptev sea    | MT654636        | MT655309        |
| <i>Dendronotus patricki</i>                | SIO-BIC M12133        | USA: California       | HQ225828        | HQ225829        |
| <i>Dendronotus primorjensis</i>            | ZMMU:Op-419           | Russia: Sea of Japan  | KX672010        | KX672008        |
| <i>Dendronotus primorjensis</i>            | ZMMU:Op-420           | Russia: Sea of Japan  | KX672011        | KX672009        |
| <i>Dendronotus primorjensis</i>            | W196                  | -                     | KT031812        | KT031825        |
| <i>Dendronotus robilliardi</i>             | ZMMU:Op-568           | Russia: Kamchatka     | KX788138        | KX788126        |
| <i>Dendronotus robilliardi</i>             | ZMMU:Op-659           | USA: Washington       | MK302459        | MK302454        |
| <i>Dendronotus robilliardi</i>             | IE251                 | Russia: Kamchatka     | KX058077        | KX058117        |
| <i>Dendronotus robilliardi</i>             | IE252                 | Russia: Kamchatka     | KX058078        | KX058118        |
| <i>Dendronotus robustus</i>                | ZMMU:Op-343           | Russia: Barents Sea   | KM397002        | KM397084        |

|                                  |               |                          |          |          |
|----------------------------------|---------------|--------------------------|----------|----------|
| <i>Dendronotus robustus</i>      | ZMMU:Op-344   | Russia: Barents Sea      | KM397003 | KM397085 |
| <i>Dendronotus robustus</i>      | ZMMU:Op-390.5 | Russia: Barents Sea      | KM396968 | KM397051 |
| <i>Dendronotus rufus</i>         | LACM:174861   | USA: Alaska              | KX058084 | GU339191 |
| <i>Dendronotus rufus</i>         | LACM:174863   | USA: Alaska              | KX058085 | KX058122 |
| <i>Dendronotus subramosus</i>    | ZMMU:Op-699   | USA: Washington          | MN808564 | MN811029 |
| <i>Dendronotus subramosus</i>    | WS9098        | USA: Oregon              | MN138347 | MN138113 |
| <i>Dendronotus velifer</i>       | ZMMU:Op-348   | Russia: Kara Sea         | MF685027 | KY996407 |
| <i>Dendronotus velifer</i>       | ZMMU:Op-546   | Russia: Laptev Sea       | KY996409 | KY996405 |
| <i>Dendronotus velifer</i>       | IE182         | -                        | MN138352 | MN138118 |
| <i>Dendronotus venustus</i>      | ZMMU:Op-660   | USA: Washington          | MK302460 | MK302455 |
| <i>Dendronotus venustus</i>      | CPIC-01179    | Canada: British Columbia | MN138363 | MN138129 |
| <i>Dendronotus yrjargul</i>      | ZMMU: Op-718  | Norway: Norwegian Sea    | MT654641 | MT655313 |
| <i>Dendronotus yrjargul</i>      | NTNU-VM-76302 | Norway: Norwegian Sea    | MT654642 | MT655314 |
| <i>Dendronotus yrjargul</i>      | NTNU-VM-76306 | Norway: Norwegian Sea    | MT654643 | MT655315 |
| <i>Dendronotus yrjargul</i>      | NTNU-VM-76308 | Norway: Norwegian Sea    | MT654644 | MT655316 |
| <i>Dendronotus yrjargul</i>      | NTNU-VM-76305 | Norway: Norwegian Sea    | MT654645 | MT655317 |
| <i>Dendronotus yrjargul</i>      | WS9116        | Russia: Kara Sea         | MN138317 | MN138082 |
| <i>Dendronotus yrjargul</i>      | WS9113        | Russia: Kara Sea         | MN138316 | MN138081 |
| <i>Dendronotus yrjargul</i>      | WS9117        | Russia: Kara Sea         | MN138318 | MN138083 |
| <i>Dendronotus yrjargul</i>      | WS9103        | Russia: White Sea        | MN138311 | MN138076 |
| <i>Dendronotus yrjargul</i>      | WS9126        | Russia: White Sea        | MN138312 | MN138077 |
| <i>Dendronotus yrjargul</i>      | WS9127        | Russia: White Sea        | MN138313 | MN138078 |
| <i>Dendronotus zakuro</i>        | KSNHM: OP0485 | Japan                    | MN808562 | MN811027 |
| <i>Dendronotus zakuro</i>        | ZMMU:Op-700   | Russia: Kamchatka        | MN808561 | MN811026 |
| <i>Doto coronata</i>             | ZMMU:Op-571   | Russia: Barents Sea      | KX788145 | KX788133 |
| <i>Doto tuberculata</i>          | BELUM Mn33142 | UK                       | KJ486734 | KJ486756 |
| <i>Duvaucelia odhneri</i>        | CASIZ:176219  | South Africa             | HM162716 | HM162641 |
| <i>Duvaucelia plebeia</i>        | ZMMU:Op-572   | Norway                   | KX788134 | KX788122 |
| <i>Marionia arborescens</i>      | CASIZ:177578  | Philippines              | HM162722 | HM162646 |
| <i>Marionia blainvillea</i>      | CASIZ:176812  | Portugal                 | HM162721 | HM162645 |
| <i>Notobryon thompsoni</i>       | CASIZ:176362  | South Africa             | JN869456 | JN869413 |
| <i>Notobryon wardi</i>           | CASIZ:177540  | Philippines              | JN869454 | JN869411 |
| <i>Pseudobornella orientalis</i> | ZMMU: Op-664  | Russia: Sea of Japan     | MT654637 | MT655310 |
| <i>Pseudobornella orientalis</i> | CASIZ:174989  | China                    | -        | HM162628 |
| <i>Pseudobornella orientalis</i> | CASIZ:174988  | China                    | -        | -        |
| <i>Scyllaea pelagica</i>         | CASIZ184317   | Philippines              | JN869459 | JN869416 |
| <i>Scyllaea fulva</i>            | SRR3726701    |                          | KX889746 | MK100991 |
| <i>Tethys fimbria</i>            | -             | -                        | AY345035 | AY345035 |

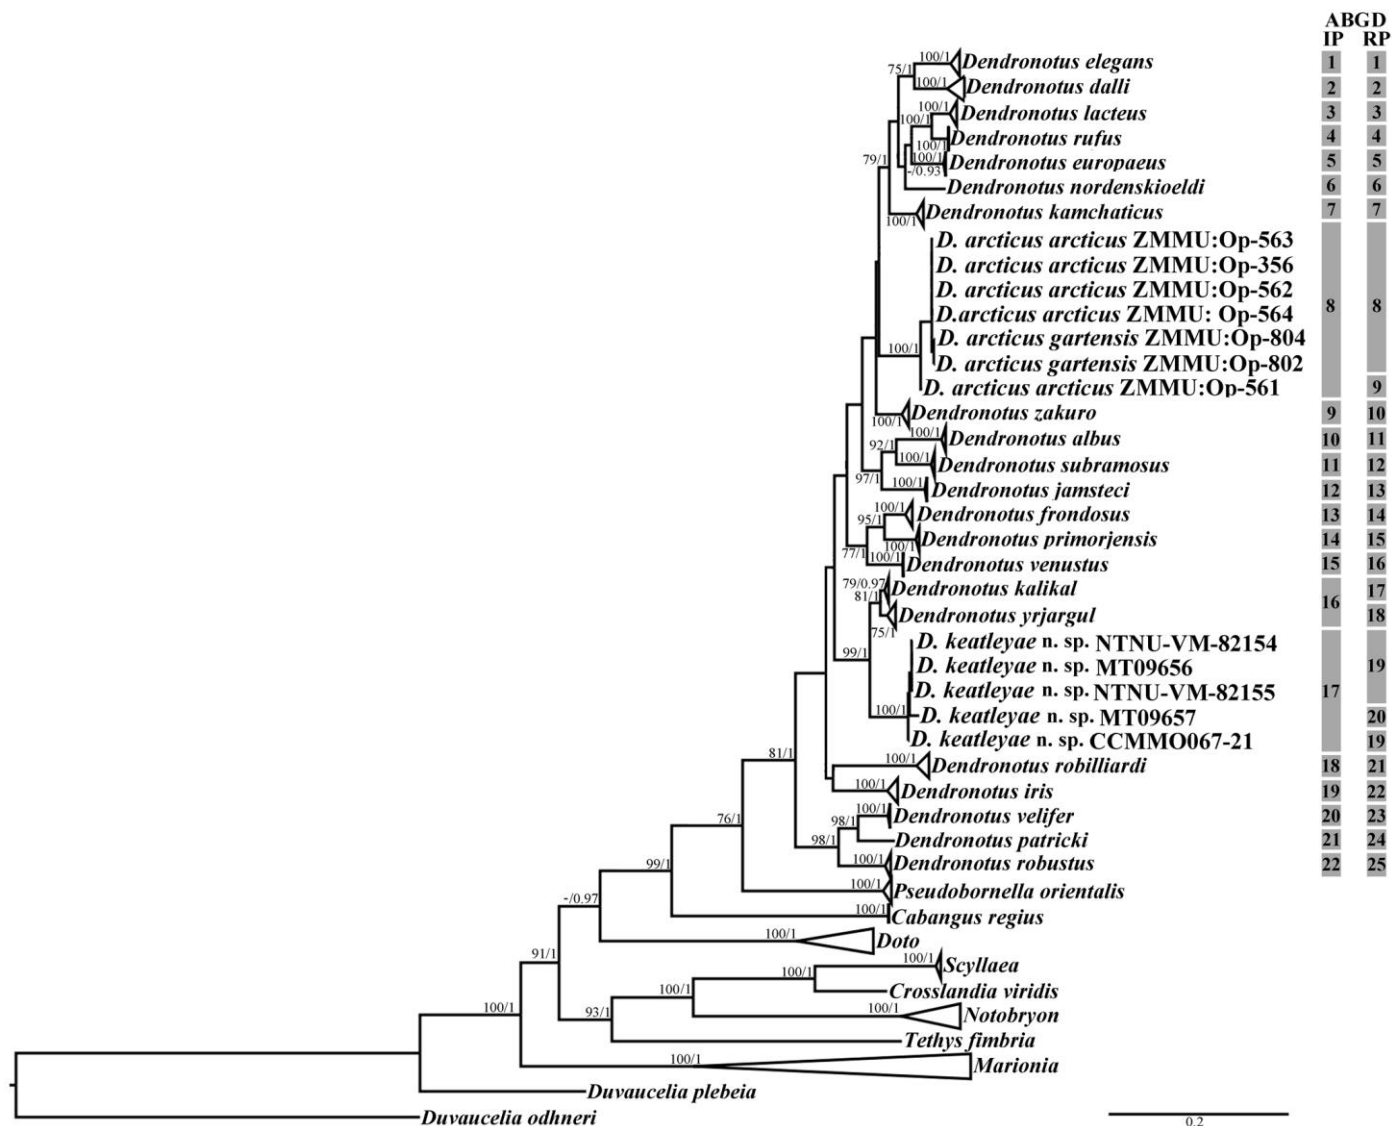

**Figure S1.** Phylogenetic relationships of the species of the genus *Dendronotus* based on COI + 16S concatenated dataset inferred by Maximum Likelihood. Numbers represent bootstrap values for Maximum Likelihood and posterior probabilities from Bayesian Inference. Some branches are collapsed at species level. The phylogenetic analyses summarize the dataset provided for recently published synoptic review of the family Dendronotidae (Korshunova et al., 2020), and the new data (highlighted in bold). Summary of species delimitation results from ABGD analyses for the COI dataset is shown. The grey bars depict putative species recognized by the initial (IP) and recursive (RP) partitioning of ABGD.
